# 1 Mapping the plague through natural language processing

2 Fabienne Krauer, Boris V. Schmid

3  
4 Author affiliation

5 *Centre for Ecological and Evolutionary Synthesis, Department of Biosciences, University of Oslo, 0316 Oslo, Norway*

6  
7 Corresponding author:  
8 [fabienne.krauer@ibv.uio.no](mailto:fabienne.krauer@ibv.uio.no)

9  
10  
11 Keywords: plague, infectious diseases, historical epidemiology, outbreaks, natural language  
12 processing, machine learning  
13

---

## 14 Abstract

15 Pandemic diseases such as plague have produced a vast amount of literature providing information  
16 about the spatiotemporal extent of past epidemics, circumstances of transmission, symptoms, or  
17 countermeasures. However, the manual extraction of such information from running text is a tedious  
18 process, and much of this information has therefore remained locked into a narrative format. Natural  
19 Language processing (NLP) is a promising tool for the automated extraction of epidemiological data  
20 from texts, and can facilitate the establishment of datasets. In this paper, we explore the utility of NLP  
21 to assist in the creation of a plague outbreak dataset. We first produced a gold standard list of  
22 toponyms by manual annotation of a German plague treatise published by Sticker in 1908. We then  
23 investigated the performance of five pre-trained NLP libraries (Google NLP, Stanford CoreNLP,  
24 spaCy, germaNER and Geoparser.io) for the automated extraction of location data from a compared  
25 to the gold standard. Of all tested algorithms, spaCy performed best (sensitivity 0.92, F1 score 0.83),  
26 followed closely by Stanford CoreNLP (sensitivity 0.81, F1 score 0.87). Google NLP had a slightly  
27 lower performance (F1 score 0.72, sensitivity 0.78). Geoparser and germaNER had a poor sensitivity  
28 (0.41 and 0.61) From the gold standard list we produced a plague dataset by linking dates and  
29 outbreak places with GIS coordinates. We then evaluated how well automated geocoding services  
30 such as Google geocoding, Geonames and Geoparser located these outbreaks correctly. All geocoding  
31 services performed poorly and returned the correct GIS information only in 60.4%, 52.7% and 33.8%  
32 of all cases. The rate of correct matches was particularly low when it came to historical regions and  
33 places. Finally, we compared our newly digitized plague dataset to a re-digitized version of the plague  
34 treatise by Biraben and provide an update of the spatio-temporal extent of the second pandemic plague  
35 outbreaks. We conclude that NLP tools have their limitations, but they are potentially useful to  
36 accelerate the collection of data and the generation of a global plague outbreak database.

---

## 37 Introduction

38 Information about the places and times of epidemics are among the core aspects of infectious disease  
39 epidemiology. One of the most notorious infectious diseases – the plague – has produced a large body  
40 of publications about its historical spatio-temporal spread. Among the most complete compilations  
41 of places where plague reportedly occurred are the works of Sticker in 1908 (Sticker, 1908) and

NOTE: This preprint reports new research that has not been certified by peer review and should not be used to guide clinical practice.

42 Biraben in 1975 (Biraben, 1975). A brief overview over other publications is given in Table S1.  
43 Narrative plague texts must typically be converted into quantitative data in order to be usable for  
44 epidemiological analyses. However, the manual extraction of data from running text is time and labor  
45 intensive.

46 In the past few years, advances in machine learning algorithms and increasing computing efficiency  
47 have led to a rise of digital methods in epidemiology (Salathe, 2018). Particularly the automated  
48 generation of data from text through Natural Language Processing (NLP) has gained popularity. For  
49 example, NLP approaches have been used to analyze the spread of infectious diseases based on social  
50 media postings (Broniatowski et al., 2013) or to analyze the geographical distribution of cholera  
51 mentions in the UK Registrar General's reports from England and Wales in the 19<sup>th</sup> century (Murrieta-  
52 Flores et al., 2015). The plague dot txt project at the University of Edinburgh has recently started to  
53 develop a NLP workflow to build a structured account of plague epidemiology based on treatises and  
54 publications about the third pandemic (Casey et al., 2020). To our knowledge, the latter is the only  
55 project to date that explores the use of NLP in plague research.

56 The possibilities of NLP algorithms are manifold. They can partition a text word-wise (tokenization),  
57 analyze the syntax (position-of-speech, POS), identify entities (named entity recognition, NER) or  
58 analyze the sentiment or relations among entities. The NER analysis identifies and classifies tokens  
59 into pre-defined categories based on rules (i.e. a dictionary), statistical predictions, or both. A special  
60 case of NLP NER is the extraction of geographical data from a text (geoparsing). Geoparsing  
61 comprises the identification of a geographical entity (toponym) and the linkage of the geographical  
62 entity with GIS data such as coordinates (geocoding). In theory, both steps can be done by hand and/or  
63 separately, but automated workflows may be preferable because they are faster and more reproducible.

64 In general, text mining tools can accelerate the generation of large spatio-temporal datasets, but their  
65 performance has to be sufficient to outweigh the errors arising from the automated process. The  
66 performance of these algorithms depends on the chosen model or algorithm, and the structure and  
67 language of the text. Ideally, an NLP algorithm has a high recall or sensitivity (e. g. the proportion of  
68 locations that are correctly identified as locations) and a high specificity (e. g. the proportion of non-  
69 locations that are correctly identified as non-locations). Various NLP algorithms and libraries have  
70 been tested for modern English medical and non-medical texts and their performances differ  
71 substantially (see e.g. (Dreisbach et al., 2019; Gritta et al., 2018)). The sensitivity and the precision  
72 of the Edinburgh Geoparser, a popular tool for historical English texts, was found to vary between 60  
73 and 80% depending on the text type and the relative frequencies of the location entities (Grover et al.,  
74 2010).

75 There is a growing scientific interest in building a global database of historical plague outbreak (van  
76 Bavel et al., 2019). The Black Death Digital Archives project  
77 (<http://globalmiddleages.org/project/black-death-digital-archive-project>) initiated by Green and  
78 Roosen aims to “newly interrogate our traditional sources of historical information” and to link  
79 biological, archaeological and documentary databases (Green and Roosen, 2019). We here contribute  
80 to this effort with a case study on the use of NLP to facilitate the digitization of plague location data.  
81 We use the plague treatise by Sticker (Sticker, 1908) as an example. We compare the application of  
82 different NLP libraries and geocoding services for the extraction of place names and coordinates.  
83 Finally, we compared our novel, geocoded plague dataset to Biraben’s plague dataset - which we

84 newly re-digitized and geocoded - to highlight the benefits of drawing information from a broader  
85 corpus of literature.

## 86 **Methods**

### 87 **Source text**

88 A short description of the structure of Sticker's work is given in the supplement (Text S1). The text  
89 is a combination of running text interspersed with semi-tabulated year and place listings. The running  
90 text contains both specific information about places that mention plague in a given year, but also  
91 general information on plague as well as historical anecdotes and elaborations. A scanned OCR  
92 version of the book is freely available on the Internet Archive (<https://archive.org/details/abhandlungenausd01stic/mode/2up>).

### 94 **Pre-processing and establishment of gold standard location list**

95 In a first preprocessing step, we cleaned the raw OCR text manually. We removed interspersed tables,  
96 end-of-line hyphenations, page numbers, headers, and notes in the book margins. We corrected  
97 misaligned text and checked the text file for OCR errors by looking for special characters and words  
98 that were not recognized by the Notepad++ Spell Checker. To facilitate the automated geoparsing  
99 approach, we also removed all words or sentences in parentheses, which were mainly author names  
100 and references and thus irrelevant for the tagging. We then established the gold standard list of  
101 location toponyms, with both authors independently annotating the preprocessed text using the  
102 annotator tool webanno (version 3.5.9) (Eckart de Castilho et al., 2016). We included all  
103 administrative place, region or country names as well as natural features such as "the Black Sea".  
104 Associative toponyms such as "the Bishop of Avignon" were excluded because they are not true  
105 locations. We then compared our two annotations and established a consensus document. This list of  
106 toponyms contained all geographical entities in the text irrespective of whether the location was  
107 linked to plague or not. This gold standard list was used for the evaluation of the tagging performance  
108 of various NLP libraries (see below). A schematic of the workflow is shown in Fig. S1.

### 109 **Establishment of plague dataset**

110 We used the gold standard location list to generate the final dataset of places with plague outbreaks.  
111 For this we extracted text snippets of 100 characters before and after each toponym to obtain the  
112 context and decided for each case individually whether it was linked to a specific plague outbreak. If  
113 the context was unclear, we referred back to the original text. Furthermore, we extracted the  
114 corresponding years (usually a four-digit string) using regular expression (regex) and allocated them  
115 manually to the corresponding toponym. We also linked the referenced author names (i.e. the source  
116 of the information) with the corresponding places wherever it was available. Finally, we batch  
117 geocoded the locations of the plague dataset using the REST API services of ArcGIS  
118 (<https://developers.arcgis.com/rest/>) to query the GIS information for each place. We extracted the  
119 modern place names, the country ISO code, the centroid and bounding box coordinates and the type  
120 of administrative unit. The bounding box coordinates are the minimum and maximum longitudes and  
121 latitudes of a given administrative unit, and can be used a proxy for the spatial extent of a place. The  
122 coordinates are provided in WGS84. All ArcGIS geocoded locations were individually inspected and  
123 mapped to detect improbable results. Ambiguous or unclear toponyms or questionable results were  
124 checked individually by consulting the original literature or other sources referenced therein. Entries

125 that could not be identified through automatic geocoding were looked up and coded manually if  
126 identifiable. Historical or colloquial regions without a clear administrative border were geocoded  
127 approximatively by defining the boundary coordinates manually based on maps on Wikipedia and  
128 calculating the arithmetic centroid coordinates. Toponyms that could not be localized exactly were  
129 geocoded according to the next lower identifiable level administrative unit and were marked as  
130 approximate. Toponyms that could not be localized at all were marked as unknown. We categorized  
131 all results as one of the following: place (city, town, village, neighborhood, district, municipality and  
132 other populated place), administrative unit (county, state and province), country, island and region  
133 (colloquial area, historical or geographical region, and natural features such as streams, mountains or  
134 lakes). This dataset was used for the performance evaluation of the geocoding algorithms and is also  
135 the final output of our study. The study was conducted in a Windows environment with a german  
136 locale. All work was carried out in R/R Studio (version 4.0.0) and Notepad++. The R code and the  
137 final plague datasets are available in a repository (<https://doi.org/10.5281/zenodo.6587267>) (Krauer  
138 and Schmid, 2021).

### 139 **Toponym NER performance evaluation**

140 We tested four different NLP libraries and one geoparser for the identification of toponyms: Google  
141 NLP (Google Ireland Limited, 2019a), Stanford CoreNLP (Manning et al., 2014) with the pre-trained  
142 German model version 2018-10-05 (Faruqui and Padó, 2010), spaCy (Explosion, 2019b) with the  
143 pre-trained German model version 2.1.0 (Explosion, 2019a), germaNER (Benikova et al., 2015) and  
144 Geoparser.io (Geoparser Inc, 2019). For a technical comparison of the libraries see supplement Table  
145 S2. We performed syntax analysis (POS) to obtain the tokens, and named entity recognition (NER)  
146 to obtain the toponyms. All libraries except germaNER require running text as input. The NER for  
147 germaNER was done using the tokenization returned by spaCy. Geoparser.io only returns toponyms  
148 and the corresponding GIS information but not the tokenization of the complete text. Google NLP,  
149 spaCy and Stanford CoreNLP each have a different algorithm for tokenization, which results in a  
150 slightly different numbers of tokens returned. The main difference arises from how the different  
151 libraries treat punctuation in relation to words or numbers (e.g. “usw.” or “1346-47” may be treated  
152 as one or two tokens). Google, Stanford coreNLP and geoparser do not accept pre-tokenized text as  
153 input. For an accurate comparison we combined all in one dataset by mapping all the entities to the  
154 tokens of the gold standard. After the mapping, we re-categorized the entities of all five approaches  
155 as “location” or “other” (which includes non-identified tokens). If geographical entities were not  
156 recognized completely by a text mining algorithm, we allowed also for partial matches for the  
157 calculation of the performance indicators. For example, “Freiburg im Breisgau” could be identified  
158 as “Freiburg” or the full name. We then compared the sensitivity (recall, true positive rate), the  
159 specificity (selectivity, true negative rate), the accuracy, the positive and negative predictive value  
160 (PPV and NPV), the F1 score and Cohen’s Kappa. The formal definition of all measures is given in  
161 supplement Text S2 and Table S3. The German Stanford CoreNLP java library (version 2018-10-05)  
162 was downloaded from the Stanford NLP Github Page ([https://stanfordnlp.github.io/CoreNLP/human-](https://stanfordnlp.github.io/CoreNLP/human-languages.html)  
163 [languages.html](https://stanfordnlp.github.io/CoreNLP/human-languages.html)) and accessed through the R package coreNLP (version 0.4.2) (Arnold and Tilton,  
164 2016). SpaCy (v2.0) was downloaded and accessed through the R package spacyr (version 1.2)  
165 (Benoit and Matsuo, 2019). The java standalone for GermaNER was downloaded from the Github  
166 account (<https://github.com/tudarmstadt-lt/GermaNER>) and run from the command line.

## 167 **Geocoding performance evaluation**

168 We also assessed the performance of three alternative geocoding services: Google (Google Ireland  
169 Limited, 2019b), Geoparser.io (Geoparser Inc, 2019), which combines the toponym recognition and  
170 geocoding, and Geonames (GeoNames, 2019). Geoparser.io returns only the name of the toponym,  
171 the type and the centroid coordinates. Google and Geonames.io provide more GIS information such  
172 as lower level administrative area units and place names in local or alternative languages. Google and  
173 Geoparser.io return the best match (according to internal criteria), while Geonames returns all  
174 possible matches in a ranked order. To make the algorithms comparable we picked only the first (i.e.  
175 best) match returned by Geonames. However, we restricted the Geonames search to places (P),  
176 administrative units (A), areas (L) and natural features (T, H and V). If no full match was found, we  
177 accepted also partial (fuzzy) match for Geonames and Google. We defined the following conditions  
178 for a result to be a match: 1) If both the gold standard entity and the comparator entity were a country  
179 and the country ISO codes agreed, 2) If both the gold standard entity and the comparator entity were  
180 a place or region in the same country and the Euclidian distance between the centroids of the standard  
181 and comparator was less than 30 km (for small entities with a standard bounding box up to 30 km),  
182 or less than half of the bounding box diameter of the standard (for larger entities with a standard  
183 bounding box diameter of more than 30 km). Based on the count of matches we calculated the  
184 proportion of toponyms identified (i.e. whether there was a result nor not) and the proportion of  
185 toponyms correctly identified for each approach. We also examined the mismatches and checked  
186 whether there was a potential regional or other bias in the geocoding. All Geocoding services were  
187 accessed through their REST-APIs between September and October 2019 using a designated batch  
188 geocoding script.

## 189 **Plague data description and comparison**

190 Finally, we summarized the spatial and temporal coverage of our dataset and compared it with a re-  
191 digitized version of Biraben's list (see supplemental Text S2). For this, we merge the two datasets by  
192 year and centroid coordinates. We calculated the proportion of full matches among all observations  
193 of both datasets for the same time period, plotted all locations in both datasets and compared the  
194 corresponding time series. We then restricted the merged dataset to the time period of the second  
195 pandemic and to exactly localized places (without regions, countries or other administrative areas) to  
196 update and summarize the spatio-temporal extent of the plague outbreaks.

## 197 **Results**

### 198 **Gold standard**

199 The cleaned OCR text of chapters five to sixteen of Sticker's treatise on plague was 864,106  
200 characters long. Removing the author citations that are present throughout the text reduced the length  
201 to 842,918 characters. We identified 7884 geographical entities (5.4% of all tokens) with manual  
202 annotation. Of these 7884 toponyms only 4474 (57%) referred to a specific plague outbreak in a  
203 specific year (Fig. 1). The rest were mainly repeated mentions of the same locations for a given year  
204 or additional geographical information to describe a place (e.g. "Geverske *near Ostrovizza in the*  
205 *region of Zara*"). Of these 4474 toponyms, 4087 (91.4%) could be localized exactly. Eight toponyms  
206 (0.2%) could not be localized at all ("unknown"). The remaining 379 toponyms (8.5%) were either  
207 colloquial or historical regions (e.g. "Podolia") without clearly defined modern boundaries, or  
208 populated places that could not be localized exactly but were attributed to a lower level administrative



209 unit. These are marked as “approximate” in the final dataset. The automated geocoding procedure  
210 matched 93.8% of all entries, but 6.2% could not be geocoded with ArcGIS and had to be looked up  
211 manually. Only 4.8% of all entries that were historical regions and 21% of all entries that were  
212 colloquial areas could be identified automatically through the ArcGIS geocoding services.

213

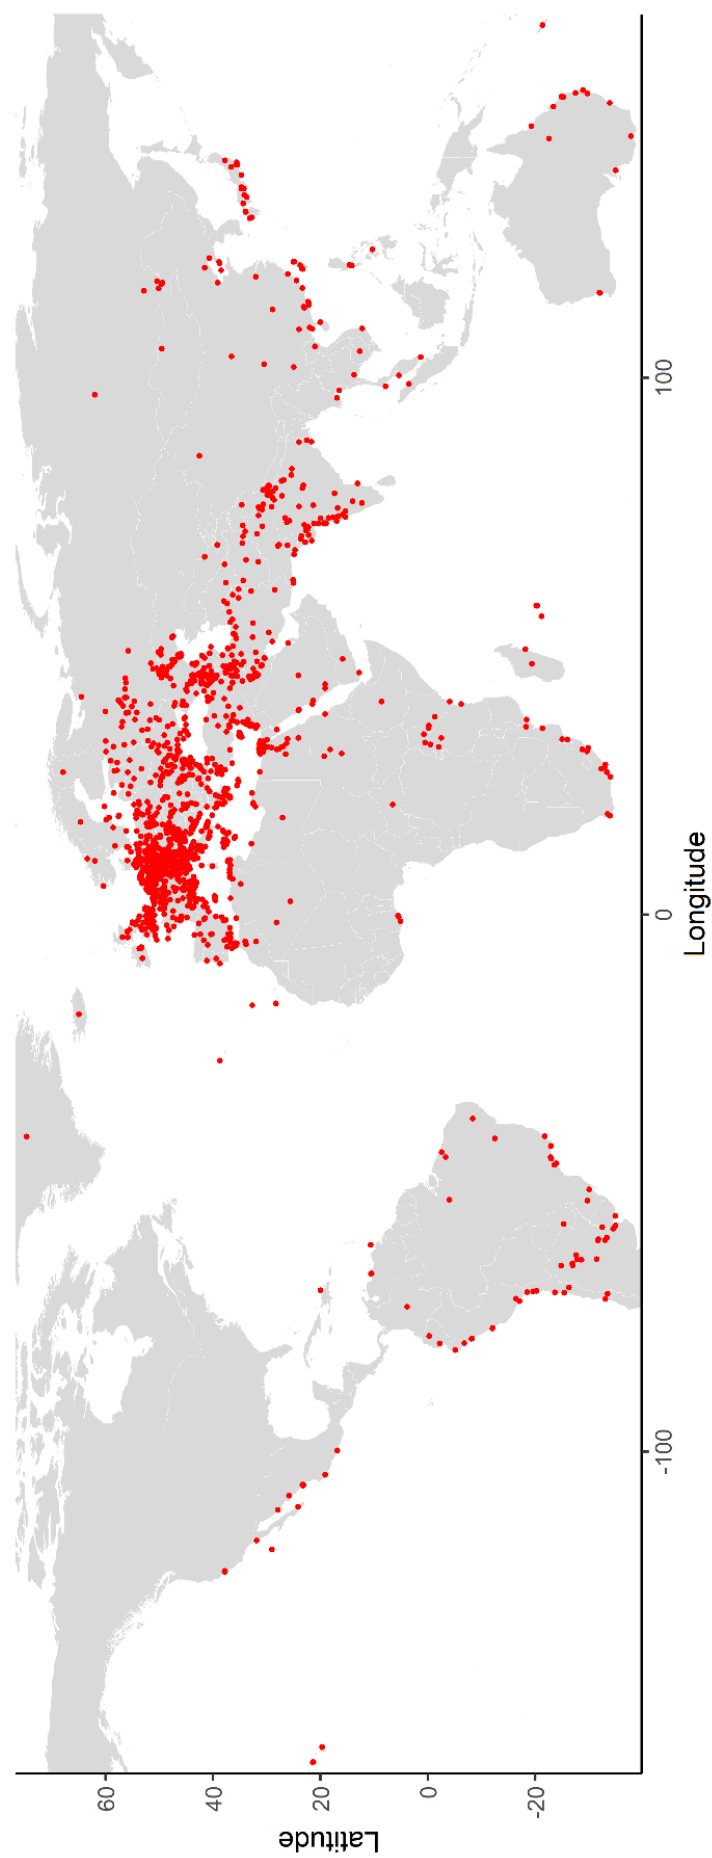

**Fig. 1.** Spatial coverage of all geocoded geographical units (exact and approximate). Note that the data include different administrative levels from village to country, and the dots denote the centroids of each geographical entity.

## 214 **Toponym NER performance evaluation**

215 The spaCy and the Stanford CoreNLP tokenizers yielded a similar number of total tokens (146,766  
216 and 146,743 respectively) while Google NLP returned marginally less tokens (146,340) (Table S4).  
217 GermaNER identified the most entities (34% of all recognized tokens = 50,374), followed by Google  
218 NLP (23% of all recognized tokens = 33,925), spaCy (9% of all recognized tokens = 12,963), Stanford  
219 coreNLP (6.5% of all recognized tokens = 9522) and Geoparser.io (3563). After mapping the results  
220 to the standard tokenization, Google and spaCy identified the largest percentage of all tokens  
221 identified as locations (6.4% and 6.6%), followed by Stanford coreNLP (4.6%) and germaNER  
222 (3.9%). The Geoparser.io algorithm identified only 2.4% of the tokens as locations.

223 Overall, the proportion of correctly identified entities (accuracy) was large for all five libraries (range  
224 0.97-0.99) (Table 1). The spaCy library showed the highest sensitivity (0.92), followed by Stanford  
225 CoreNLP (0.82), Google (0.78), germanNER (0.62) and Geoparser.io (0.41). The specificity was  
226 equally high for all algorithms (range 0.98-0.99). Stanford coreNLP had the highest precision (PPV,  
227 0.95, i.e. 5% of the positives are false), followed by Geoparser.io (0.9), germaNER (0.85), spaCy  
228 (0.75) and Google (0.66). The F1 scores and Cohen's kappa coefficients suggested a good overall  
229 performance for Stanford CoreNLP (0.88 and 0.87) and spaCy (0.83 and 0.81), a mediocre overall  
230 performance for Google NLP (0.72 and 0.70) and GermanER (0.71 and 0.70) and a poor performance  
231 for Geoparser.io (0.56 and 0.55).

232 Most false positives arose from a rather broad definition of "location" consistent across all libraries,  
233 which included also nouns related to physical locations such as "Stadt" (town, city), "Ort" (locality)  
234 or "Haus" (house) (Fig. S2). Only 26% of the location tokens were correctly identified as such by all  
235 libraries and 2% of the locations were missed by all libraries. Locations that were missed by all  
236 included Germanized spelling (e.g. "Hoschiarpur" for "Hoshiarpur"), latin spelling (e.g.  
237 "Centumcellae" for "Civitavecchia"), composite entities (e.g. "Gurjewscher Kreis"), historic regions  
238 (e.g. "Podolien", "Gevaudan") or ambiguous words (e.g. "Sind" is a location but also a conjugated  
239 verb form of "to be"). Compared to the other libraries, spaCy had a remarkable low number of FNs  
240 (Fig. S3). All libraries performed better on toponyms for cities or towns, whereas natural features or  
241 small villages proved to be more difficult (Fig. S4). spaCy identified historical regions correctly as  
242 toponyms more often than the other libraries (percentage false negatives among all historical regions:  
243 Spacy 4.8%, coreNLP 26.7%, Google 29.9%, Germaner 51.9% and geoparser 73.8%).

244

245 **Table 1.** Performance of different NLP algorithms for the identification of toponyms (location nouns)  
246 after mapping to a common tokenization.

|             | Google NLP | Stanford<br>CoreNLP | spaCy  | germaNER | Geoparser |
|-------------|------------|---------------------|--------|----------|-----------|
| TP          | 6154       | 6435                | 7267   | 4858     | 3237      |
| FP          | 3168       | 333                 | 2462   | 863      | 342       |
| TN          | 135316     | 138151              | 136022 | 137621   | 138142    |
| FN          | 1730       | 1449                | 617    | 3026     | 4647      |
| Accuracy    | 0.97       | 0.99                | 0.98   | 0.97     | 0.96      |
| Sensitivity | 0.78       | 0.82                | 0.92   | 0.62     | 0.41      |



|               |      |      |      |      |      |
|---------------|------|------|------|------|------|
| Specificity   | 0.98 | 0.99 | 0.98 | 0.99 | 0.99 |
| PPV           | 0.66 | 0.95 | 0.75 | 0.85 | 0.90 |
| NPV           | 0.99 | 0.99 | 0.99 | 0.98 | 0.97 |
| F1 score      | 0.72 | 0.88 | 0.83 | 0.71 | 0.56 |
| Cohen's Kappa | 0.70 | 0.87 | 0.81 | 0.70 | 0.55 |

247

## 248 **Geocoding performance evaluation**

249 To evaluate the geocoding performances, we used the 1856 unique location names from the plague  
250 dataset. Google and Geonames geolocated substantially more toponyms (74.8% and 75.3%) than  
251 Geoparser.io (44.4%). Google and Geonames also geolocated more places correctly than geoparser  
252 (60.5% and 52.7% vs. 35.7%). Many of the mismatches occurred for regions where places were  
253 renamed as the ruling power changed, through colonization or the contraction and expansion of  
254 empires (e.g. in the regions of Armenia, Georgia or the Balkans) or where a phonetic translation of  
255 the original place name was used (e.g. entities located in Iran, Iraq, Ukraine, Russia or Kazakhstan)  
256 All geocoding services struggled to geocode historical regions, but Geonames and Google performed  
257 better (19.7% and 14.8% geocoded) than Geoparser (6.6%) (Fig. S4). Colloquial areas were also  
258 poorly geocoded (Google 23.5%, Geonames 20.6% and Geoparser 5.9%).

## 259 **Description of plague data sets**

### 260 **Comparison of Sticker and Biraben**

261 The final Sticker dataset contained 4474 plague location observations, of which 91.4% could be  
262 localized exactly, 8.5% were localized approximatively and 0.1% could not be localized. Of the  
263 identified locations, 1631 were unique locations. The Biraben data set had much more data points and  
264 unique locations (11,180 observations, 2158 unique locations), of which 95.2% were localized  
265 exactly, 3.5% were localized approximately and 1.3% could not be localized) (Table S5). There was  
266 some overlap of the data points: 37% of the Sticker data were also in Biraben, and 15% of the Biraben  
267 data were also in Sticker. The majority of the data points in Sticker were located in Germany (13.6%),  
268 while Biraben had most data points in France (30.2%) (Fig. S5A). In both datasets, the majority of  
269 locations were places (Sticker 70.1%, Biraben 83.3%). Sticker contained more historical or colloquial  
270 regions or administrative units than Biraben, thus the average bounding box diagonal of a location  
271 was marginally larger for Sticker (17.6 km vs. 12.1 km) (Fig. S6). The most frequent places in Sticker  
272 were Istanbul (90 mentions, 2%), London (74 mentions, 1.7%) and Cairo (44 mentions, 1%) (Fig.  
273 S5B). Biraben listed the most outbreaks for London (166 mentions, 1.5%), Istanbul (118 mentions,  
274 1.1%) and Algiers (114 mentions, 1%). Both data sets have the same overall temporal coverage from  
275 the Black Death period to the beginning of the 20<sup>th</sup> century (Fig. S5C). However, the majority of  
276 entries in Biraben are from the 16<sup>th</sup>-17<sup>th</sup> century, while the majority of Sticker is from the 17<sup>th</sup>-18<sup>th</sup>  
277 century.

### 278 **Spatial and temporal extent of second pandemic plague outbreaks**

279 Fig. 2 shows all exactly localized places (without countries, regions or other administrative units)  
280 with plague outbreaks or occurrences reported during the second pandemic (1346-1894) resulting  
281 from both datasets. We found 1404 new observations (817 unique locations) in the Sticker dataset,  
282 which were not listed in Biraben. These were mainly in eastern Europe, southern Russia and the

283 Caucasus region, as well as India and Iran. London had the largest number of outbreaks (265),  
284 followed by Istanbul/Constantinople (205), Algiers (138), Paris (115), Cairo (113), Izmir/Smyrna  
285 (107), Venice (103) and Amiens (102). As shown in Fig. 3, the spatio-temporal extent of plague  
286 outbreaks shifted considerably over time. Until the 17<sup>th</sup> century we observe the majority of the data  
287 in Central Europe. In the 18<sup>th</sup> century the focus appears to have shifted to Eastern Europe and North  
288 Africa. Finally, in the 19<sup>th</sup> century the majority of outbreaks seemed to be reported in southeast  
289 Europe and West Asia.

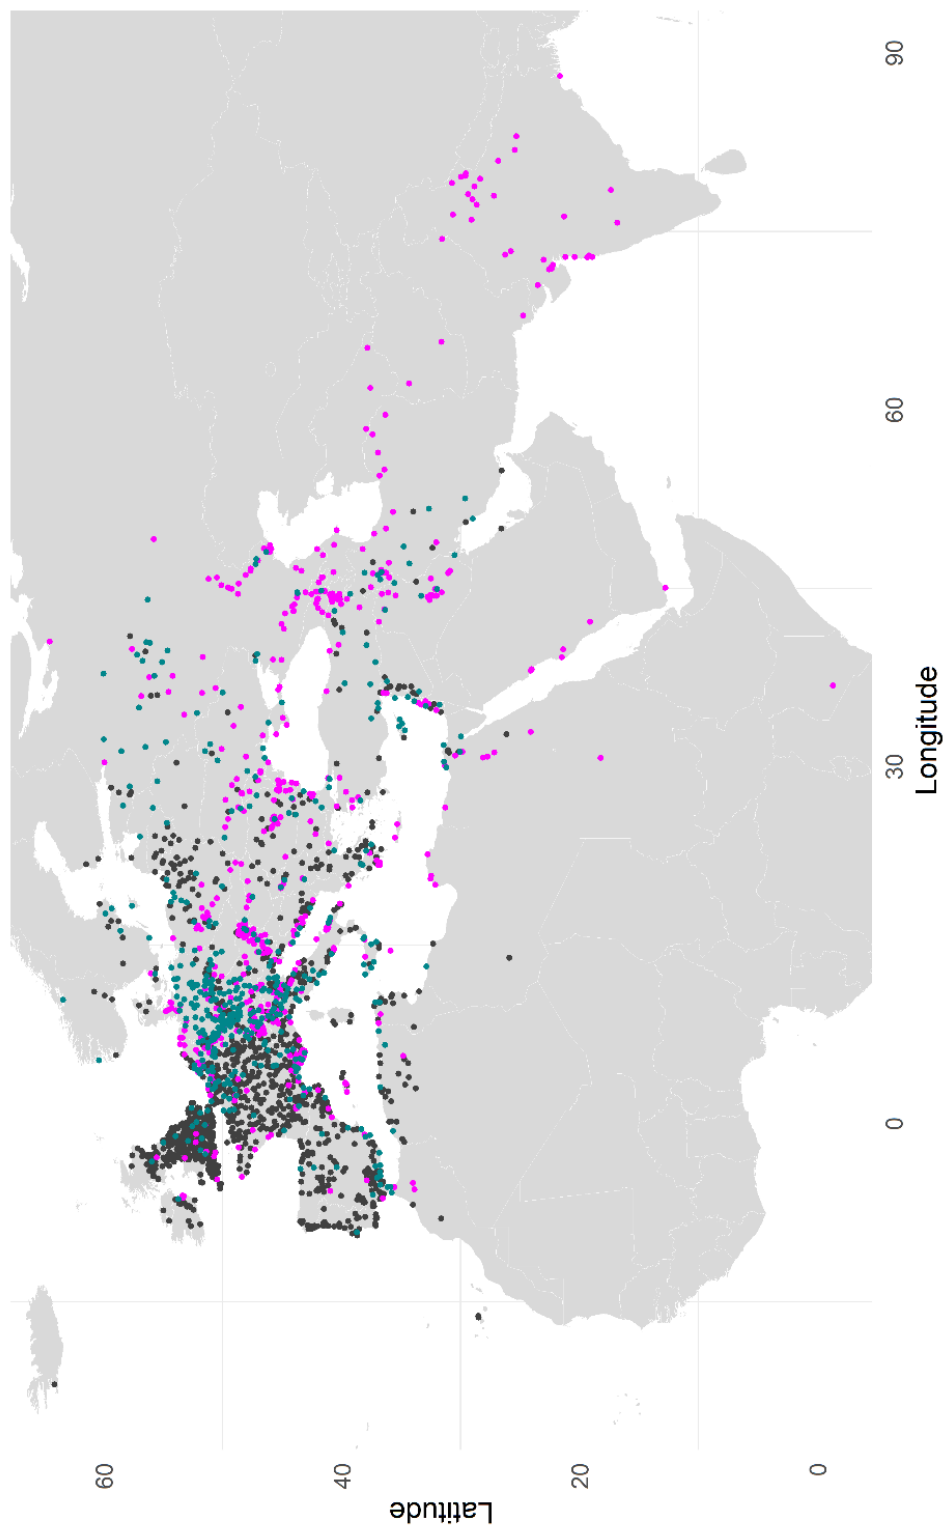

**Fig. 2.** Places with plague during the second pandemic outbreaks in the data set of Biraben (grey), Sticker (pink) and both (blue).

290

291

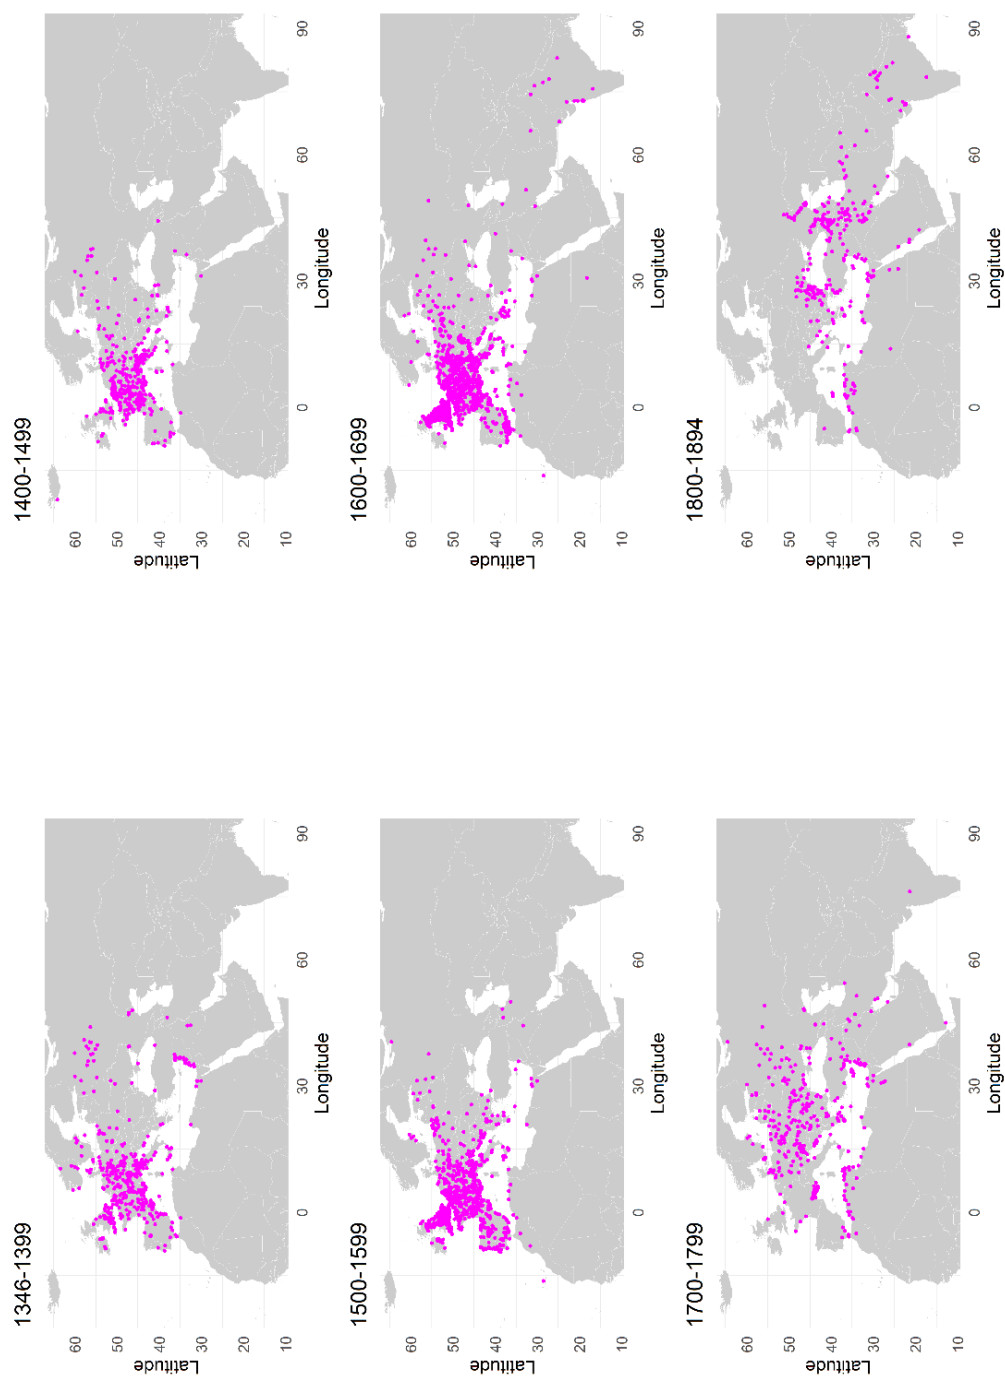

**Fig. 3.** Spatio-temporal extent of the second pandemic plague outbreaks derived from Biraben and Sticker. The dots denote all exactly localized places, but exclude countries, regions or other administrative areas. For better readability, one data point in Nairobi (Kenya) of an outbreak in 1892 was omitted from the map.

292

293

## 294 **Discussion**

295 We have demonstrated how natural language processing (NLP) libraries and geocoding/geoparsing  
296 tools can be used to detect, extract and georeference locations in a running text to facilitate the  
297 collection and digitization of plague data from a running text. We have shown that the performance  
298 of the different algorithms can vary substantially. For the given German text, Stanford's coreNLP  
299 and spaCy had a better overall performance than Google's NLP, germaNER and Geoparser.io. While  
300 spaCy was better at detecting the true locations (i.e. high sensitivity), Stanford coreNLP was  
301 marginally better at avoiding the non-locations (i.e. high specificity). However, all algorithms had a  
302 high specificity. Geoparser.io showed a poor performance and missed more than half of the true  
303 locations. According to the authors the algorithm works best with English texts, but there is limited  
304 information online on how the model was trained. It also showed a poorer performance in returning  
305 the correct coordinates compared to Google and Geonames. Overall, the sensitivity of all algorithms  
306 was imperfect, and a small proportion of locations remained undetected even with the best performing  
307 algorithm. All tested algorithms were substantially faster than manual annotation (less than 30  
308 minutes vs. several days per annotator). The sensitivity of Stanford CoreNLP (0.81) and Google NLP  
309 (0.78) on Sticker's treatise on plague was comparable to previous results from modern text corpora  
310 (0.64-0.89 and 0.77-0.87, respectively) (Dale, 2018; Gritta et al., 2020; Pinto et al., 2016; Schmitt et  
311 al., 2019), but spaCy outperformed its expectations, with a higher sensitivity (0.92) than advertised  
312 by the authors of the library (0.85) (Explosion, 2019a) and estimated in previous studies on English  
313 texts (0.57-0.75) (Gritta et al., 2020; Schmitt et al., 2019). Our F1 score for germaNER was somewhat  
314 lower (0.71) than evaluated by the authors of the algorithm (0.81) (Benikova et al., 2015). In terms  
315 of performance, it is more important to have a high sensitivity than a high specificity, because it is  
316 easier to remove false positives in the results than look for false negatives (missed locations) in a text.  
317 Thus, based on our findings, we recommend to use spaCy for entity recognition in combination with  
318 a geocoding services that also cover historical place names regions for the extraction of outbreak data  
319 from rather historical texts. All tested geocoding services showed a poor performance in geolocating  
320 historical regions and colloquial areas, but their performance could potentially be improved by  
321 passing on additional information such as the country or region to the geocoding service. Geonames  
322 also stores historical place names, and filtering all returned matches instead of accepting the best  
323 match could further improve the toponym recognition, but we have not tested this here.

## 324 **Advantages and limitations of NLP for the extraction of outbreak data**

325 NLP libraries combined with geoparsers/geocoding tools are extremely useful to quickly generate  
326 quantitative data, but we have encountered some limitations for this specific project. As anticipated,  
327 these pre-trained models could not distinguish whether the mention of a geographical unit was related  
328 to a specific plague outbreak or not. This information can only be extracted from the context, but  
329 these standard models were not trained to recognize these situations. In this study, we have checked  
330 the link to a plague outbreak for each location entry manually, which is far from ideal. Moreover, the  
331 detection of time units was not optimal. We did not test the year numbers recognition formally, but  
332 we observed that Google, spaCy and Stanford CoreNLP don't differentiate between years and any  
333 other number. For our plague dataset, we used regular expressions (regex), which can identify specific  
334 combinations of letters or numbers. The final linking of a specific year with a specific plague location  
335 was done manually again, since the order of appearance and the format in which years and locations  
336 were reported was not consistent throughout the text. Thus, the tested pre-trained NLP algorithms  
337 could not replace manual work entirely in our project.

338 The main potential of NLP and geoparsing for outbreak data extraction lies in custom trained models  
339 and reproducible, fully automated workflows. Some of the analyses that we did manually or in  
340 separate steps can potentially be improved with an automated procedure. Preprocessing of the raw  
341 OCR text prior to applying the NLP algorithms is inevitable, but OCR errors are often consistent and  
342 can be corrected with rule-based replacements as we have partially done here. NLP or geoparser  
343 libraries can be trained specifically on historical texts to improve the recognition of outdated spellings  
344 or old place names, and detect and extract relations of entities. The latter could potentially be used to  
345 link a specific outbreak to a specific place and time mention in the text. Text mining tools such as  
346 word embedding (i.e. linkage of entities by their proximity in the text) could also be used to detect  
347 relations. A custom trained model could also reduce the false positive rate for physical locations (e.g.  
348 “house” or “city”), which was an issue with all tested libraries. Examples of NLP models trained on  
349 epidemiological data include a recently published NLP pipeline (EpiTator) that uses the spaCy library  
350 in combination with Geonames specifically for the annotation of epidemiological data such as dates  
351 and date ranges, disease-related information and location data from running text (EcoHealth Alliance,  
352 2019). This tool has also been custom trained on the incidence database of the Robert Koch Institut  
353 to detect emerging infections, and has shown a promising performance for country recognition (85%  
354 correctly classified), disease recognition (88% correctly classified) and date recognition (81%  
355 correctly identified) (Abbood et al., 2020). The aforementioned plague dot txt project is also  
356 pioneering the field with automated OCR optimization and extended NER for the recognition of  
357 plague-specific ontology and dates (Casey et al., 2020). Given the continuous emergence of infectious  
358 diseases and the exponentially increasing amount of epidemiological literature, we expect the  
359 landscape of NLP tools and pipelines trained on epidemiological texts to growth and improve in the  
360 coming years. Our dataset could be used by others as a training set for both improved toponym and  
361 relation recognition.

## 362 **Usage and limitations of geo-referenced plague datasets**

363 We here also present two open, georeferenced plague datasets (Krauer and Schmid, 2021): the newly  
364 digitized Sticker dataset and an improved digitization of Biraben’s plague second pandemic appendix.  
365 The Biraben dataset has been digitized twice before (Atanasiu V et al., 2008; Buntgen et al., 2012),  
366 of which Büntgens version has been used by a number of studies (Schmid et al., 2015; Yue et al.,  
367 2016; Yue and Lee, 2018, 2020; Yue et al., 2017). These studies have rightfully drawn criticism for  
368 not contextualizing the biases and uncertainties inherent to such aggregated accounts that cover a vast  
369 amount of space and time (Roosen and Curtis, 2018; van Bavel et al., 2019). Both Biraben (and  
370 colleagues) as well as Sticker may have been more likely to include sources from specific regions or  
371 countries due to easier access to archives or familiarity with the language of the source texts. It is not  
372 by accident that the majority of plague occurrences of Biraben are in France and the majority of  
373 Sticker in Germany. Also, some regions might be poorly represented by sources due to cultural  
374 differences in what was perceived important to write down, or poor archiving conditions. These issues  
375 can lead to spatial and/or temporal selection bias in the data. Thus, the absence of plague occurrences  
376 listed in these datasets is not necessarily an absence of outbreaks. Moreover, the retrospective  
377 identification of a plague outbreak from historical sources is also often problematic, and the criteria  
378 that Sticker and Biraben used to include or exclude information are unclear. In this study, we have  
379 not verified the data, but we have provided references to the original sources wherever they were  
380 indicated by Sticker, which allows users to cross-check questionable entries. Biraben’s treatise was  
381 digitized from the tables provided in the appendix, which did not include references for each outbreak.



382 However, the treatise itself includes an extensive bibliography for the origin of the data, which may  
383 be linked manually to specific outbreaks. Both datasets have inherent limitations due to the nature of  
384 the data collection and the digitization process. They are presented here as uncommented digitizations  
385 of all second and third plague pandemic entries provided in the Biraben and Sticker plague treatises,  
386 and should not be regarded as fully prepared and finalized plague data sets. Additional data cleaning  
387 and source verification is required depending on the research question and type of analysis. For  
388 example, the geographical scales of the observations in both datasets are very heterogeneous ranging  
389 from small villages to whole countries or historical regions spanning several hundreds of kilometers.  
390 For quantitative modelling studies, we recommend to work with data points that represent  
391 approximately the same geographic level. We have provided the bounding box coordinates and  
392 diagonal for each data point (which gives a rough estimate of the current geographical extent) as well  
393 as the type of location, which can be used to select data carefully. We also advise to check for  
394 duplicate entries for the same place in the same year, which occurred occasionally when the original  
395 dataset listed two separate entries for the same location (for example Saoudje and Boulak for Saoudje-  
396 Boulak, presently Mahabad, or individual parishes in London). As a caveat, most location coordinates  
397 provided in our datasets refer to the modern locations and we did not correct for potential geographical  
398 displacements over time. In the case of historical regions, we used the bounding coordinates based  
399 on historical maps on Wikipedia. The borders of these regions are thus only approximate.

400 Quantitative analyses will benefit from improved, georeferenced datasets, for example for the  
401 reconstruction of regional transmission chains or potentially the identification of putative historical  
402 plague reservoirs (Carmichael, 2014). As others have mentioned (Benedictow, 2019; van Bavel et al.,  
403 2019), data collections such as our compilation of Biraben and Sticker can act as a foundation to  
404 which more data are added (and faulty data are labelled as such) in order to build an updated database  
405 of global plague outbreaks. The growing number of scanned and OCR encoded documents made  
406 available online (for example on the Internet Archive) provides a rich resource for historical  
407 epidemiology, which should be used with the right tools and the necessary caution. Combining plague  
408 data from different sources to fill the spatial and temporal gaps could potentially reduce the problem  
409 of spatial and/or temporal representativeness, and improve our understanding of the spatio-temporal  
410 spread. Particularly, new data on the plague dissemination in neglected regions such as sub-Saharan  
411 Africa (Green, 2018), Turkey and Southern Asia (Green, 2014; Green, 2018; Varlik, 2020) could  
412 confirm whether the shift of plague activity from Europe to North Africa in the 16<sup>th</sup> to 19<sup>th</sup> century,  
413 and the growing presence of plague in Asia in the 17<sup>th</sup> to 19<sup>th</sup> century is a real pattern or merely an  
414 artefact of missing data in the centuries before. However, consistency in the data definition and  
415 collection is crucial. The understanding of the spatio-temporal dynamics of the past and present  
416 plague pandemic is a big challenge, which is best tackled with a collaborative and interdisciplinary  
417 effort, and in the spirit of open data.

## 418 **Funding**

419 This work was supported by funding from the Centre for Ecological and Evolutionary Synthesis  
420 (CEES), University of Oslo, and the Research Council of Norway (FRIMEDBIO project 288551).

421 **Author contributions**

422 **Fabienne Krauer:** Conceptualization, Methodology, Software, Formal analysis, Data curation,  
423 Writing – Original draft, Writing – Review & Editing, Visualization **Boris V. Schmid:** Data curation,  
424 Writing – Review & Editing, Supervision, Funding acquisition

425 **Ethics statement**

426 Not applicable.

427 **Data accessibility statement**

428 The R code and the digitized plague datasets are available in a public repository (Krauer and  
429 Schmid, 2021) (<https://doi.org/10.5281/zenodo.6587267>).

430 **Competing interests statement**

431 We declare we have no competing interests.

432

## 433 **References**

- 434 Abbood, A., Ullrich, A., Busche, R., Ghozzi, S., 2020. EventEpi—A natural language processing  
435 framework for event-based surveillance. *PLOS Computational Biology* 16, e1008277.
- 436 Arnold, T., Tilton, L., 2016. coreNLP: Wrappers Around Stanford CoreNLP Tools.
- 437 Atanasiu V, Priol C, Tournieroux A, E, O., 2008. Georeferences for places of plague occurrence in  
438 Europe 1347-1600.
- 439 Benedictow, O.J., 2019. Biraben's lists of the plague epidemics of the second plague pandemic, 1346  
440 - c. 1690: problems, basis, uses. *Annales de démographie historique* n°138, 213-223.
- 441 Benikova, D., Yimam, S.M., Santhanam, P., Biemann, C., 2015. GermaNER: Free Open German  
442 Named Entity Recognition Tool, Campus Essen, Germany.
- 443 Benoit, K., Matsuo, A., 2019. spacyr: Wrapper to the 'spaCy' 'NLP' Library.
- 444 Biraben, J.-N., 1975. *Les hommes et la peste en France et dans les pays européens et méditerranéens.*  
445 Mouton, Paris.
- 446 Broniatowski, D.A., Paul, M.J., Dredze, M., 2013. National and local influenza surveillance through  
447 Twitter: an analysis of the 2012-2013 influenza epidemic. *PloS one* 8, e83672.
- 448 Buntgen, U., Ginzler, C., Esper, J., Tegel, W., McMichael, A.J., 2012. Digitizing historical plague.  
449 *Clin Infect Dis* 55, 1586-1588.
- 450 Carmichael, A.G., 2014. Plague persistence in Western Europe: a hypothesis. *The Medieval Globe* 1,  
451 157-191.
- 452 Casey, A., Bennett, M., Tobin, R., Grover, C., Walker, I., Engelmann, L., Alex, B., 2020. Plague Dot  
453 Text: Text mining and annotation of outbreak reports of the Third Plague Pandemic (1894-1952).  
454 *Journal of Data Mining & Digital Humanities*.
- 455 Dale, R., 2018. Text analytics APIs, Part 1: The bigger players. *Natural Language Engineering* 24,  
456 317-324.
- 457 Dreisbach, C., Koleck, T.A., Bourne, P.E., Bakken, S., 2019. A systematic review of natural language  
458 processing and text mining of symptoms from electronic patient-authored text data. *Int J Med Inform*  
459 125, 37-46.
- 460 Eckart de Castilho, R., Mújdricza-Maydt, É., Yimam, S.M., Hartmann, S., Gurevych, I., Frank, A.,  
461 Biemann, C., 2016. A Web-based Tool for the Integrated Annotation of Semantic and Syntactic  
462 Structures, Proceedings of the workshop on Language Technology Resources and Tools for Digital  
463 Humanities (LT4DH) at COLING 2016, Osaka, Japan, pp. 76-84.
- 464 EcoHealth Alliance, 2019. EpiTator.
- 465 Explosion, 2019a. *de\_core\_news\_sm-2.1.0*.
- 466 Explosion, 2019b. *spaCy v2.x*.
- 467 Faruqui, M., Padó, S., 2010. Training and evaluating a German named entity recognizer with semantic  
468 generalization, Die Konferenz zur Verarbeitung Natürlicher Sprache (KONVENS), Saarbrücken,  
469 Germany.
- 470 GeoNames, 2019.
- 471 Geoparser Inc, 2019. *geoparser.io*.
- 472 Google Ireland Limited, 2019a. Google Cloud Natural Language API.
- 473 Google Ireland Limited, 2019b. The Google Maps Platform Geocoding API.
- 474 Green, M., 2014. Taking "Pandemic" Seriously: Making the Black Death Global. *Medieval Globe* 1,  
475 27-61.
- 476 Green, M., Roosen, J., 2019. Biraben 2.0: A Black Death Digital Archive.
- 477 Green, M.H., 2018. Putting Africa on the Black Death map: Narratives from genetics and history.  
478 *Afriques*.
- 479 Gritta, M., Pilehvar, M.T., Collier, N., 2020. A pragmatic guide to geoparsing evaluation: Toponyms,  
480 Named Entity Recognition and pragmatics. *Lang Resour Eval* 54, 683-712.
- 481 Gritta, M., Pilehvar, M.T., Limsopatham, N., Collier, N., 2018. What's missing in geographical  
482 parsing? *Lang Resour Eval* 52, 603-623.

- 483 Grover, C., Tobin, R., Byrne, K., Woollard, M., Reid, J., Dunn, S., Ball, J., 2010. Use of the  
484 Edinburgh geoparser for georeferencing digitized historical collections. *Philos Trans A Math Phys*  
485 *Eng Sci* 368, 3875-3889.
- 486 Krauer, F., Schmid, B.V., 2021. Datasets and code for "Mapping the plague through natural language  
487 processing", 1.0 ed, Zenodo. doi: 10.5281/zenodo.6587267.
- 488 Manning, C., Surdeanu, M., Bauer, J., Finkel, J., Bethard, S., McClosky, D., 2014. The Stanford  
489 CoreNLP Natural Language Processing Toolkit, Proceedings of 52nd Annual Meeting of the  
490 Association for Computational Linguistics: System Demonstrations. Association for Computational  
491 Linguistics, Baltimore, Maryland, pp. 55-60. doi: 10.3115/v1/P14-5010.
- 492 Murrieta-Flores, P., Baron, A., Gregory, I., Hardie, A., Rayson, P., 2015. Automatically Analyzing  
493 Large Texts in a GIS Environment: The Registrar General's Reports and Cholera in the 19th Century.  
494 *Transactions in GIS* 19, 296-320.
- 495 Pinto, A., Gonçalo Oliveira, H., Oliveira Alves, A., 2016. Comparing the Performance of Different  
496 NLP Toolkits in Formal and Social Media Text, 5th Symposium on Languages, Applications and  
497 Technologies (SLATE'16). Schloss Dagstuhl--Leibniz-Zentrum fuer Informatik. doi:  
498 10.4230/OASICS.SLATE.2016.3.
- 499 Roosen, J., Curtis, D.R., 2018. Dangers of Noncritical Use of Historical Plague Data. *Emerging*  
500 *infectious diseases* 24, 103-110.
- 501 Salathe, M., 2018. Digital epidemiology: what is it, and where is it going? *Life Sci Soc Policy* 14, 1.
- 502 Schmid, B.V., Buntgen, U., Easterday, W.R., Ginzler, C., Walloe, L., Bramanti, B., Stenseth, N.C.,  
503 2015. Climate-driven introduction of the Black Death and successive plague reintroductions into  
504 Europe. *Proceedings of the National Academy of Sciences of the United States of America* 112, 3020-  
505 3025.
- 506 Schmitt, X., Kubler, S., Robert, J., Papadakis, M., LeTraon, Y., 2019. A Replicable Comparison  
507 Study of NER Software: StanfordNLP, NLTK, OpenNLP, SpaCy, Gate, 2019 Sixth International  
508 Conference on Social Networks Analysis, Management and Security (SNAMS), pp. 338-343. doi:  
509 10.1109/snams.2019.8931850.
- 510 Sticker, G., 1908. *Abhandlungen aus der Seuchengeschichte und Seuchenlehre. Band 1: Die Pest. A.*  
511 *Töpelmann, Giessen.*
- 512 van Bavel, B.J.P., Curtis, D.R., Hannaford, M.J., Moatsos, M., Roosen, J., Soens, T., 2019. Climate  
513 and society in long-term perspective: Opportunities and pitfalls in the use of historical datasets. *Wiley*  
514 *Interdiscip Rev Clim Change* 10, e611.
- 515 Varlik, N., 2020. The plague that never left: restoring the Second Pandemic to Ottoman and Turkish  
516 history in the time of COVID-19. *New Perspectives on Turkey*, 1-14.
- 517 Yue, R.P., Lee, H.F., Wu, C.Y., 2016. Navigable rivers facilitated the spread and recurrence of plague  
518 in pre-industrial Europe. *Sci Rep* 6, 34867.
- 519 Yue, R.P.H., Lee, H.F., 2018. Pre-industrial plague transmission is mediated by the synergistic effect  
520 of temperature and aridity index. *BMC infectious diseases* 18, 134.
- 521 Yue, R.P.H., Lee, H.F., 2020. Drought-induced spatio-temporal synchrony of plague outbreak in  
522 Europe. *Sci Total Environ* 698, 134138.
- 523 Yue, R.P.H., Lee, H.F., Wu, C.Y.H., 2017. Trade routes and plague transmission in pre-industrial  
524 Europe. *Sci Rep* 7, 12973.

525
